# Supplementary material
Source: Research Square preprint supplement (doi:10.21203/rs.3.rs-10096350/v1)
Supplement: Supplementary file 1 [file e5cb61bda503fd26b4cddd80.docx]

Appendix A: Full Database Search Strings

PubMed/MEDLINE

("telemedicine"[MeSH] OR "telehealth"[tiab] OR "mHealth"[tiab] OR "mobile health"[tiab] OR "digital health"[tiab] OR "eHealth"[tiab] OR "remote patient monitoring"[tiab] OR "teleconsultation"[tiab] OR "SMS health"[tiab] OR "telemedicine"[tiab] OR "sante mobile"[tiab]) AND ("hypertension"[MeSH] OR "diabetes mellitus"[MeSH] OR "non-communicable diseases"[tiab] OR "chronic disease management"[tiab] OR "NCD"[tiab] OR "maladies chroniques"[tiab] OR "hypertension arterielle"[tiab] OR "diabete"[tiab]) AND ("rural"[tiab] OR "rural population"[MeSH] OR "rural health"[MeSH] OR "underserved"[tiab] OR "low-resource"[tiab] OR "communaute rurale"[tiab] OR "zone rurale"[tiab]) AND ("West Africa"[tiab] OR "Afrique de l'Ouest"[tiab] OR "Nigeria"[tiab] OR "Ghana"[tiab] OR "Senegal"[tiab] OR "Mali"[tiab] OR "Burkina Faso"[tiab] OR "Sierra Leone"[tiab] OR "Liberia"[tiab] OR "Guinea"[tiab] OR "Togo"[tiab] OR "Benin"[tiab] OR "Niger"[tiab] OR "Gambia"[tiab] OR "Cote d'Ivoire"[tiab] OR "Ivory Coast"[tiab]). Filters: 2015 to 2025; English; French.

Scopus

TITLE-ABS-KEY(("telemedicine" OR "telehealth" OR "mHealth" OR "mobile health" OR "digital health" OR "eHealth" OR "remote patient monitoring" OR "teleconsultation") AND ("hypertension" OR "diabetes" OR "non-communicable disease" OR "chronic disease management" OR "NCD" OR "maladies chroniques") AND ("rural" OR "rural health" OR "underserved" OR "low-resource" OR "zone rurale") AND ("West Africa" OR "Nigeria" OR "Ghana" OR "Senegal" OR "Mali" OR "Burkina Faso" OR "Sierra Leone" OR "Liberia" OR "Guinea" OR "Togo" OR "Benin" OR "Niger" OR "Gambia" OR "Cote d'Ivoire")) AND PUBYEAR > 2014 AND (LIMIT-TO(LANGUAGE,"English") OR LIMIT-TO(LANGUAGE,"French"))

African Journals Online (AJOL)

Block 1: telemedicine OR telehealth OR mHealth OR "mobile health" OR "digital health" OR eHealth OR teleconsultation

Block 2: hypertension OR diabetes OR "non-communicable disease" OR "chronic disease" OR NCD OR "maladies chroniques"

Block 3: rural OR "rural health" OR "low-resource" OR "zone rurale" OR "communaute rurale"

Block 4: "West Africa" OR Nigeria OR Ghana OR Senegal OR Mali OR "Burkina Faso" OR "Sierra Leone" OR Liberia OR Guinea OR Togo OR Benin OR Niger OR Gambia OR "Cote d'Ivoire". Date: 2015 to 2025; Language: English and French.

Google Scholar (Supplementary)

String 1: "telemedicine" OR "mHealth" "hypertension" OR "diabetes" "rural West Africa" 2015 to 2025

String 2: "digital health" "chronic disease" "rural" "Nigeria" OR "Ghana" OR "Senegal" 2015 to 2025

String 3: "telemedicine" "maladies chroniques" "Afrique de l'Ouest" "zone rurale" 2015 to 2025. Screening limited to first 10 pages
